# Supplementary material for: Better Oral Hygiene Is Associated with a Decreased Risk of Meniere’s Disease: A Nationwide Cohort Study
Source: MDPI journal article supplement (doi:10.3390/jpm13010080), 2022-12-29
Supplement: s1 [file s1]

Supplementary Table S1. Risk factors for the occurrence of Meniere's disease

| Variable                              | Crude HR<br>(95% CI) | p-value | Adjusted HR<br>(95% CI) | p-value |
|---------------------------------------|----------------------|---------|-------------------------|---------|
| Age, years                            |                      | < 0.001 |                         | <0.001  |
| < 65                                  | 1 (reference)        |         | 1 (reference)           |         |
| ≥ 65                                  | 2.82<br>(2.76, 2.87) |         | 1.90<br>(1.86, 1.94)    |         |
| Sex                                   |                      | <0.001  |                         | < 0.001 |
| Male                                  | 1 (reference)        |         | 1 (reference)           |         |
| Female                                | 2.22<br>(2.20, 2.25) |         | 1.76<br>(1.73, 1.79)    |         |
| Body mass index (kg/m <sup>2</sup> )  | 1.04<br>(1.01, 1.06) | < 0.001 | 1.03<br>(1.01, 1.05)    | < 0.001 |
| Household income                      |                      |         |                         |         |
| Q1, lowest                            | 1 (reference)        |         | 1 (reference)           |         |
| Q2                                    | 0.80<br>(0.79, 0.81) | < 0.001 | 0.98<br>(0.97, 1.00)    | 0.020   |
| Q3                                    | 0.81<br>(0.80, 0.82) | < 0.001 | 1.04<br>(1.02, 1.06)    | < 0.001 |
| Q4, highest                           | 0.91<br>(0.89, 0.93) | < 0.001 | 1.05<br>(1.03, 1.07)    | < 0.001 |
| Smoking                               |                      |         |                         |         |
| Never                                 | 1 (reference)        |         | 1 (reference)           |         |
| Former                                | 0.63<br>(0.61, 0.64) | < 0.001 | 0.93<br>(0.91, 0.95)    | < 0.001 |
| Current                               | 0.45<br>(0.45, 0.46) | < 0.001 | 0.72<br>(0.71, 0.73)    | < 0.001 |
| Alcohol consumption (days/week)       |                      |         |                         |         |
| < 1                                   | 1 (reference)        |         | 1 (reference)           |         |
| 1-4                                   | 0.58<br>(0.57, 0.59) | < 0.001 | 0.84<br>(0.83, 0.86)    | < 0.001 |
| ≥ 5                                   | 1.00<br>(0.96, 1.03) | 0.771   | 1.29<br>(1.24, 1.34)    | < 0.001 |
| Regular physical activity (days/week) |                      |         |                         |         |

|                                         |                      |         |                      |         |
|-----------------------------------------|----------------------|---------|----------------------|---------|
| < 1                                     | 1 (reference)        |         | 1 (reference)        |         |
| 1-4                                     | 0.73<br>(0.72, 0.74) | < 0.001 | 0.92<br>(0.91, 0.93) | < 0.001 |
| ≥ 5                                     | 1.10<br>(1.07, 1.12) | < 0.001 | 1.10<br>(1.07, 1.12) | < 0.001 |
| Comorbidities                           |                      |         |                      |         |
| Hypertension                            | 1.56<br>(1.54, 1.58) | < 0.001 | 1.31<br>(1.29, 1.33) | < 0.001 |
| Diabetes mellitus                       | 1.49<br>(1.46, 1.52) | < .0001 | 1.21<br>(1.18, 1.23) | < .001  |
| Dyslipidemia                            | 1.48<br>(1.45, 1.50) | < 0.001 | 1.24<br>(1.22, 1.26) | < 0.001 |
| Atrial fibrillation                     | 2.01<br>(1.79, 2.25) | < 0.001 | 1.28<br>(1.14, 1.43) | < 0.001 |
| Cancer                                  | 1.78<br>(1.69, 1.87) | < 0.001 | 1.39<br>(1.32, 1.46) | < 0.001 |
| Renal disease                           | 1.89<br>(1.77, 2.01) | < 0.001 | 1.10<br>(1.03, 1.18) | 0.003   |
| Oral health status                      |                      |         |                      |         |
| Periodontitis                           |                      |         |                      |         |
| No                                      | 1 (reference)        |         | 1 (reference)        |         |
| Yes                                     | 1.25<br>(1.21, 1.29) | < 0.001 | 1.18<br>(1.14, 1.22) | < 0.001 |
| Number of missing teeth                 |                      |         |                      |         |
| 0                                       | 1 (reference)        |         | 1 (reference)        |         |
| 1-7                                     | 1.23<br>(1.21, 1.25) | < 0.001 | 1.16<br>(1.15, 1.18) | < 0.001 |
| 8-14                                    | 2.08<br>(1.98, 2.18) | < 0.001 | 1.37<br>(1.30, 1.44) | < 0.001 |
| ≥ 15                                    | 2.42<br>(2.28, 2.56) | < 0.001 | 1.25<br>(1.18, 1.32) | < 0.001 |
| Oral hygiene behaviors                  |                      |         |                      |         |
| Frequency of tooth brushing (times/day) |                      |         |                      |         |
| 0-1                                     | 1 (reference)        |         | 1 (reference)        |         |
| 2                                       | 0.90<br>(0.88, 0.91) | < 0.001 | 0.91<br>(0.89, 0.93) | < 0.001 |

|                |                      |         |                      |         |
|----------------|----------------------|---------|----------------------|---------|
| $\geq 3$       | 0.72<br>(0.71, 0.74) | < 0.001 | 0.75<br>(0.73, 0.76) | < 0.001 |
| Dental scaling |                      |         |                      |         |
| No             | 1 (reference)        |         | 1 (reference)        |         |
| Yes            | 0.91<br>(0.90, 0.92) | < 0.001 | 0.98<br>(0.97, 0.99) | 0.003   |

---

Multivariable model was sex, age, body mass index, income levels, smoking, alcohol consumption, regular physical activity, hypertension, diabetes mellitus, dyslipidemia, atrial fibrillation, cancer, and renal disease.

HR, hazard ratio; CI, confidence interval; Q, quartile.

Supplementary Table S2. Risk factors for the occurrence of Meniere's disease (landmark analysis)

| Variable                              | Crude HR<br>(95% CI) | p-value | Adjusted HR<br>(95% CI) | p-value |
|---------------------------------------|----------------------|---------|-------------------------|---------|
| Age, years                            |                      | < 0.001 |                         | < 0.001 |
| < 65                                  | 1 (reference)        |         | 1 (reference)           |         |
| ≥ 65                                  | 2.81<br>(2.76, 2.86) |         | 1.90<br>(1.86, 1.93)    |         |
| Sex                                   |                      | < 0.001 |                         | < 0.001 |
| Male                                  | 1 (reference)        |         | 1 (reference)           |         |
| Female                                | 2.22<br>(2.20, 2.25) |         | 1.76<br>(1.74, 1.79)    |         |
| Body mass index (kg/m <sup>2</sup> )  | 1.03<br>(1.01, 1.05) | < 0.001 | 1.02<br>(1.01, 1.03)    | < 0.001 |
| Household income                      |                      |         |                         |         |
| Q1, lowest                            | 1 (reference)        |         | 1 (reference)           |         |
| Q2                                    | 0.80<br>(0.79, 0.81) | < 0.001 | 0.98<br>(0.97, 1.00)    | 0.021   |
| Q3                                    | 0.81<br>(0.80, 0.82) | < 0.001 | 1.04<br>(1.02, 1.05)    | < 0.001 |
| Q4, highest                           | 0.91<br>(0.89, 0.92) | < 0.001 | 1.05<br>(1.03, 1.07)    | < 0.001 |
| Smoking                               |                      |         |                         |         |
| Never                                 | 1 (reference)        |         | 1 (reference)           |         |
| Former                                | 0.63<br>(0.61, 0.64) | < 0.001 | 0.93<br>(0.91, 0.95)    | < 0.001 |
| Current                               | 0.45<br>(0.45, 0.46) | < 0.001 | 0.72<br>(0.71, 0.73)    | < 0.001 |
| Alcohol consumption (days/week)       |                      |         |                         |         |
| < 1                                   | 1 (reference)        |         | 1 (reference)           |         |
| 1-4                                   | 0.58<br>(0.57, 0.59) | < 0.001 | 0.84<br>(0.83, 0.86)    | < 0.001 |
| ≥ 5                                   | 1.00<br>(0.96, 1.03) | 0.770   | 1.29<br>(1.24, 1.34)    | < 0.001 |
| Regular physical activity (days/week) |                      |         |                         |         |
| < 1                                   | 1 (reference)        |         | 1 (reference)           |         |

|                                         |                      |         |                      |         |
|-----------------------------------------|----------------------|---------|----------------------|---------|
| 1-4                                     | 0.73<br>(0.72, 0.74) | < 0.001 | 0.92<br>(0.91, 0.93) | < 0.001 |
| ≥ 5                                     | 1.10<br>(1.08, 1.12) | < 0.001 | 1.10<br>(1.08, 1.12) | < 0.001 |
| Comorbidities                           |                      |         |                      |         |
| Hypertension                            | 1.55<br>(1.53, 1.57) | < 0.001 | 1.31<br>(1.29, 1.33) | < 0.001 |
| Diabetes mellitus                       | 1.49<br>(1.46, 1.52) | < 0.001 | 1.21<br>(1.19, 1.23) | < 0.001 |
| Dyslipidemia                            | 1.48<br>(1.45, 1.50) | < 0.001 | 1.24<br>(1.22, 1.26) | < 0.001 |
| Atrial fibrillation                     | 2.03<br>(1.81, 2.27) | < 0.001 | 1.29<br>(1.15, 1.45) | < 0.001 |
| Cancer                                  | 1.78<br>(1.69, 1.87) | < 0.001 | 1.39<br>(1.33, 1.47) | < 0.001 |
| Renal disease                           | 1.88<br>(1.76, 2.00) | < 0.001 | 1.10<br>(1.03, 1.17) | 0.006   |
| Oral health status                      |                      |         |                      |         |
| Periodontitis                           |                      |         |                      |         |
| No                                      | 1 (reference)        |         | 1 (reference)        |         |
| Yes                                     | 1.25<br>(1.21, 1.29) | < 0.001 | 1.18<br>(1.14, 1.22) | < 0.001 |
| Number of missing teeth                 |                      |         |                      |         |
| 0                                       | 1 (reference)        |         | 1 (reference)        |         |
| 1-7                                     | 1.23<br>(1.21, 1.25) | < 0.001 | 1.17<br>(1.15, 1.18) | < 0.001 |
| 8-14                                    | 2.09<br>(1.99, 2.19) | < 0.001 | 1.37<br>(1.31, 1.44) | < 0.001 |
| ≥ 15                                    | 2.40<br>(2.27, 2.55) | < 0.001 | 1.25<br>(1.17, 1.32) | < 0.001 |
| Oral hygiene behaviors                  |                      |         |                      |         |
| Frequency of tooth brushing (times/day) |                      |         |                      |         |
| 0-1                                     | 1 (reference)        |         | 1 (reference)        |         |
| 2                                       | 0.90<br>(0.88, 0.91) | < 0.001 | 0.91<br>(0.89, 0.93) | < 0.001 |
| ≥ 3                                     | 0.72<br>(0.71, 0.74) | < 0.001 | 0.75<br>(0.73, 0.76) | < 0.001 |

|                |                      |         |                      |       |
|----------------|----------------------|---------|----------------------|-------|
| Dental scaling |                      |         |                      |       |
| No             | 1 (reference)        |         | 1 (reference)        |       |
| Yes            | 0.91<br>(0.90, 0.92) | < 0.001 | 0.98<br>(0.96, 0.99) | 0.002 |

---

Multivariable model was sex, age, body mass index, income levels, smoking, alcohol consumption, regular physical activity, hypertension, diabetes mellitus, dyslipidemia, atrial fibrillation, cancer, and renal disease.

HR, hazard ratio; CI, confidence interval; Q, quartile.

Supplementary Table S3. The risk for occurrence of Meniere's disease according to oral health status and oral hygiene behaviors (landmark analysis).

|                                         | Number of patients | Number of events | Event rate (%)<br>(95% CI) | Person-years  | Incidence rate<br>(per 1000 person-years) | Adjusted HR<br>(95% CI) | p-value |
|-----------------------------------------|--------------------|------------------|----------------------------|---------------|-------------------------------------------|-------------------------|---------|
| Oral health status                      |                    |                  |                            |               |                                           |                         |         |
| Periodontitis                           |                    |                  |                            |               |                                           |                         |         |
| No                                      | 2,178,787          | 107,420          | 4.93<br>(4.90, 4.96)       | 32,960,516.87 | 3.26                                      | 1 (reference)           |         |
| Yes                                     | 61,495             | 3728             | 6.06<br>(5.87, 6.26)       | 907,634.00    | 4.11                                      | 1.18<br>(1.14, 1.22)    | < 0.001 |
| Number of missing teeth                 |                    |                  |                            |               |                                           |                         |         |
| 00                                      | 1,842,344          | 87,512           | 4.75<br>(4.72, 4.78)       | 28,037,691.04 | 3.12                                      | 1 (reference)           |         |
| 1-7                                     | 364,530            | 20,784           | 5.70<br>(5.62, 5.78)       | 5,410,048.50  | 3.84                                      | 1.17<br>(1.15, 1.18)    | < 0.001 |
| 8-14                                    | 19,451             | 1668             | 8.58<br>(8.16, 8.99)       | 257,131.76    | 6.49                                      | 1.37<br>(1.31, 1.44)    | < 0.001 |
| ≥ 15                                    | 13,957             | 1184             | 8.48<br>(8.00, 8.97)       | 163,279.58    | 7.25                                      | 1.25<br>(1.17, 1.32)    | < 0.001 |
| Oral hygiene behaviors                  |                    |                  |                            |               |                                           |                         |         |
| Frequency of tooth brushing (times/day) |                    |                  |                            |               |                                           |                         |         |
| 0-1                                     | 278,065            | 15,963           | 5.74<br>(5.65, 5.83)       | 4,066,486.23  | 3.93                                      | 1 (reference)           |         |
| 2                                       | 1,038,556          | 55,177           | 5.31<br>(5.27, 5.36)       | 15,670,466.43 | 3.52                                      | 0.91<br>(0.89, 0.93)    | < 0.001 |
| ≥ 3                                     | 923,661            | 40,008           | 4.33<br>(4.29, 4.37)       | 14,131,198.22 | 2.83                                      | 0.75<br>(0.73, 0.76)    | < 0.001 |
| Dental scaling                          |                    |                  |                            |               |                                           |                         |         |
| No                                      | 1,727,449          | 87,304           | 5.05<br>(5.02, 5.09)       | 26,035,722.87 | 3.35                                      | 1 (reference)           |         |
| Yes                                     | 512,833            | 23,844           | 4.65<br>(4.59, 4.71)       | 7,832,428.01  | 3.04                                      | 0.98<br>(0.96, 0.99)    | 0.002   |

Multivariable model was sex, age, body mass index, income levels, smoking, alcohol consumption, regular physical activity, hypertension, diabetes mellitus, dyslipidemia, atrial fibrillation, cancer, and renal disease.  
HR, hazard ratio; CI, confidence interval.
